# Supplementary material for: Summer sea ice floe perimeter density in the Arctic: high-resolution optical satellite imagery and model evaluation
Source: Copernicus journal article supplement (doi:10.5194/tc-17-3575-2023), 2023-08-25
Supplement: Supplementary file 1 [file tc-17-3575-2023-supplement.zip]

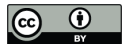

## *Supplement of*

# **Summer sea ice floe perimeter density in the Arctic: high-resolution optical satellite imagery and model evaluation**

**Yanan Wang et al.**

*Correspondence to:* Yanan Wang (yanan.wang@hud.ac.uk)

- tc-17-3575-2023-supplement-title-page.pdf
- Supplement
  - Supp\_Model-observation comparison\_final\_TC\_v4.docx.baiduyun.uploading.cfg
  - Supp\_Model-observation comparison\_final\_TC\_v4.pdf
  - data
    - \* README.txt
    - \* cpom\_chuk.mat
    - \* cpom\_fram.mat
    - \* fv2w\_chuk.mat
    - \* fv2w\_fram.mat
    - \* wipofsd\_chuk.mat
    - \* wipofsd\_fram.mat

The copyright of individual parts of the supplement might differ from the article licence.
