# Supplementary material for: Summer sea ice floe perimeter density in the Arctic: high-resolution optical satellite imagery and model evaluation
Source: Copernicus journal article supplement (doi:10.5194/tc-17-3575-2023), 2023-08-25
Supplement: Supplementary file 2 [file tc-17-3575-2023-supplement.zip]

## Contents of this file

S1 Perimeter density

S2 Sensitivity to the floe size category binning and  $P$  calculation methods

### S1 Perimeter density

- 5 In this study, we use the perimeter density per unit ice area  $P$  (units: km km<sup>-2</sup>) to evaluate the model performance, as it reduces the impacts of partially captured floes at the edge of the image for the FSD retrieval (Perovich, 2002; Perovich and Jones, 2014). There are a number of ways to calculate  $P$ . In the following, we describe how the FSD models calculate  $P$ , as well as how  $P$  can be calculated from the observational FSD data.

#### Calculation of $P$ in the FSD models

- 10 In FSD models,  $P$  is calculated from number FSD  $n_i$  distributed into floe size categories  $i$  as follows:

$$P = \frac{\sum_{i=1}^{12} (2\gamma r_i n_i w_i)}{c_{ice}}, \quad (S1)$$

where  $r_i$  and  $w_i$  are the midpoint and bin width for each floe size category  $i$ .  $n_i$  (m<sup>-3</sup>) is the number of floes in floe size category  $i$  per unit bin width per unit area. So  $n_i w_i$  is the number of floes per unit area for each floe size category  $i$ . The upper term in the right hand of Eq. S1 is the perimeter of floes per unit area. By dividing total floe perimeter per unit ocean area by the sea-ice concentration,  $c_{ice}$ , we obtain the total floe perimeter per unit sea ice area.

The floe fractional-area distribution  $f(r)dr$  and floe number-density distribution  $n(r)dr$  are related by

$$\int_{r_0}^{\infty} f(r)dr = \int_{r_0}^{\infty} \pi r^2 n(r)dr, \quad (S2)$$

where  $r_0$  is the lowest cut-off of floe size  $r$ . By combining Eqs. S1–S2,  $P$  for prognostic model  $P_{prog}$  can be calculated as Eq. 2 in the main text.

- 20 For WIPoFSD model, a truncated power law FSD is applied,

$$n(r|r_{min} \leq r \leq r_{var}) = cr^{-\alpha}, \quad (S3)$$

where,  $r_{min}$  is the minimum floe radius within floe size categories. The power-law exponent  $\alpha$  value used in this study is set to 2.56. The floe size parameter  $r_{var}$  varies between  $r_{min}$  and the maximum floe radius  $r_{max}$  in response to four FSD evolution processes described by Bateson et al. (2020, 2022). The normalization constant  $c$  can be defined from that the integral of areal

- 25 FSD over all floe sizes equal to the fraction of sea ice,

$$\pi \int_{r_{min}}^{r_{var}} n(r)r^2 dr = c_{ice} \quad (S4)$$

$$\text{Hence } c = \frac{(3-\alpha)c_{ice}}{(r_{var}^{3-\alpha} - r_{min}^{3-\alpha})\pi} \quad (S5)$$

Perimeter density for WIPoFSD,  $P_{wipofsd}$ , can be calculated from Eqs. S1, S3 and S5 (see Eq. 2 in the main text).

### Calculation of $P$ from the observations

30 To ensure matching with the model outputs, the FSD observation data were binned into the same 12 floe size categories used by the FSD models (Gaussian spacing). By deriving the number of all floes with effective floe radius  $r = \sqrt{\frac{a}{\pi}}$  (Horvat and Tziperman, 2015), the radius of a circle that has the same area as a floe, within every floe size category, the average number FSD for each floe size category  $n_i$  can be calculated by

$$n_i = \frac{N_i}{A_{ocean} w_i}, \quad (S6)$$

35 where  $N_i$  is the number of floes with radius between  $r_{i_{min}}$  and  $r_{i_{max}}$  in the image covering an ocean area of  $A_{ocean}$  (units: m<sup>2</sup>) with floe radius between  $r_{i_{min}}$  and  $r_{i_{max}}$ .

Similarly, the average areal FSD for floe size category  $f_i$  can be calculated by

$$f_i = \frac{A_{floe_i}}{A_{ocean} w_i}. \quad (S7)$$

$A_{floe_i}$  is the area of floes with radius between  $r_{i_{min}}$  and  $r_{i_{max}}$  in the image.

40 Now based on the equations described above, we can calculate  $P$  from the observations using three different methods. From Eqs. S2 and S6, we can produce perimeter density per unit sea ice area from observations using the number FSD,

$$P_{obs1} = \frac{\sum_{i=1}^{12} (2\gamma r_i N_i)}{A_{ice}}, \quad (S8)$$

where  $A_{ice}$  is the total area of sea ice within the image.

Based on Eq. 2 in the main text and Eq. S7 shown above, the perimeter density can be calculated by,

$$45 \quad P_{obs2} = \sum_{i=1}^{12} \frac{2\gamma A_{floe_i}}{\pi r_i A_{ice}}. \quad (S9)$$

Additionally, we can calculate the floe perimeter density directly from our images,

$$P_{obs3} = \frac{p_{floe}(r_{1_{min}} < r < r_{12_{max}})}{A_{ice}}, \quad (S10)$$

where  $p_{floe}$  is the total perimeter of floes with radius between  $r_{1_{min}}$  and  $r_{12_{max}}$  in the image. In Sect. S2, we will test the sensitivity of calculating the perimeter density using Eqs. S8–S10.

### 50 **S2 Sensitivity to the floe size category binning and $P$ calculation methods.**

In this section, we check the sensitivity of calculating  $P$  for different binning methods and different  $P$  calculation methods (Eqs. S8–S10 in Sect. S1). To test the sensitivity of the binning methods, we organised the observational FSD data into four different binning methods: 12 Gaussian-spaced bins, 24 Gaussian-spaced bins, 12 evenly spaced bins, and 24 evenly spaced bins. For the binning, we discarded any ice floes with the effective radius smaller than 0.1 m or larger than 951 m.

55 Figure S1 shows the results in the relationship between  $P$  and SIC. As can be seen in Figure S1, the  $P$  values from evenly spaced binning methods are very sensitive to the different  $P$  calculation methods (Figure S1c and d). On the other hand, the  $P$

values from Gaussian spaced binning methods are much less sensitive to the different  $P$  calculation methods and there are very small differences in the sensitivities between 12 Gaussian spaced binned data and 24 Gaussian spaced binned data (Figure S1a and S1b). Among the three different  $P$  calculation methods,  $P_{obs2}$  (Eq. S9, estimated using the floe area) shows the smallest variation throughout the four different binning methods. Based on this, we selected  $P_{obs2}$  to calculate  $P$  and use it as the metric for the model-observation comparison and the 12 Gaussian-spaced binning method to match with the model configuration in Roach et al. (2018a) and Bateson et al. (2022).

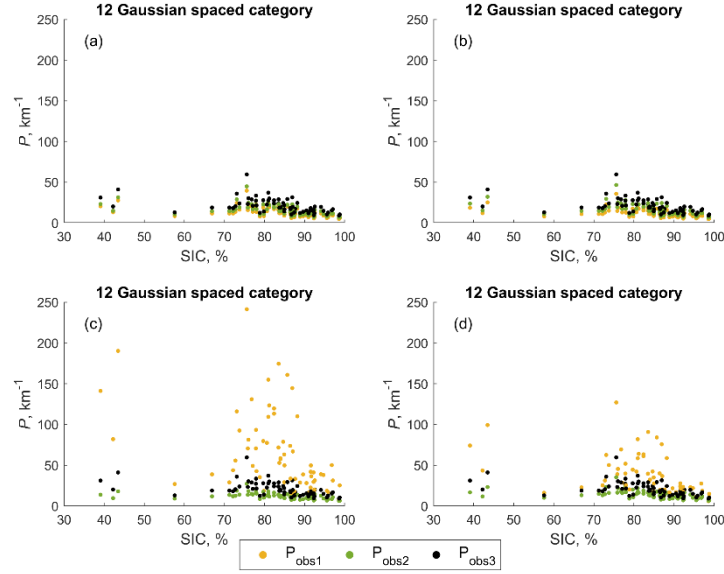

**Figure S1.** Relationship between perimeter density per unit ice area and SIC for (a) 12 Gaussian-spaced binning, (b) 24 Gaussian-spaced binning, (c) 12 evenly spaced binning, and (d) 24 evenly spaced binning. The perimeter density has been calculated using Eq. S8 ( $P_{obs1}$ , yellow scatter), Eq. S9 ( $P_{obs2}$ , green scatter) and Eq. S10 ( $P_{obs3}$ , black scatter).

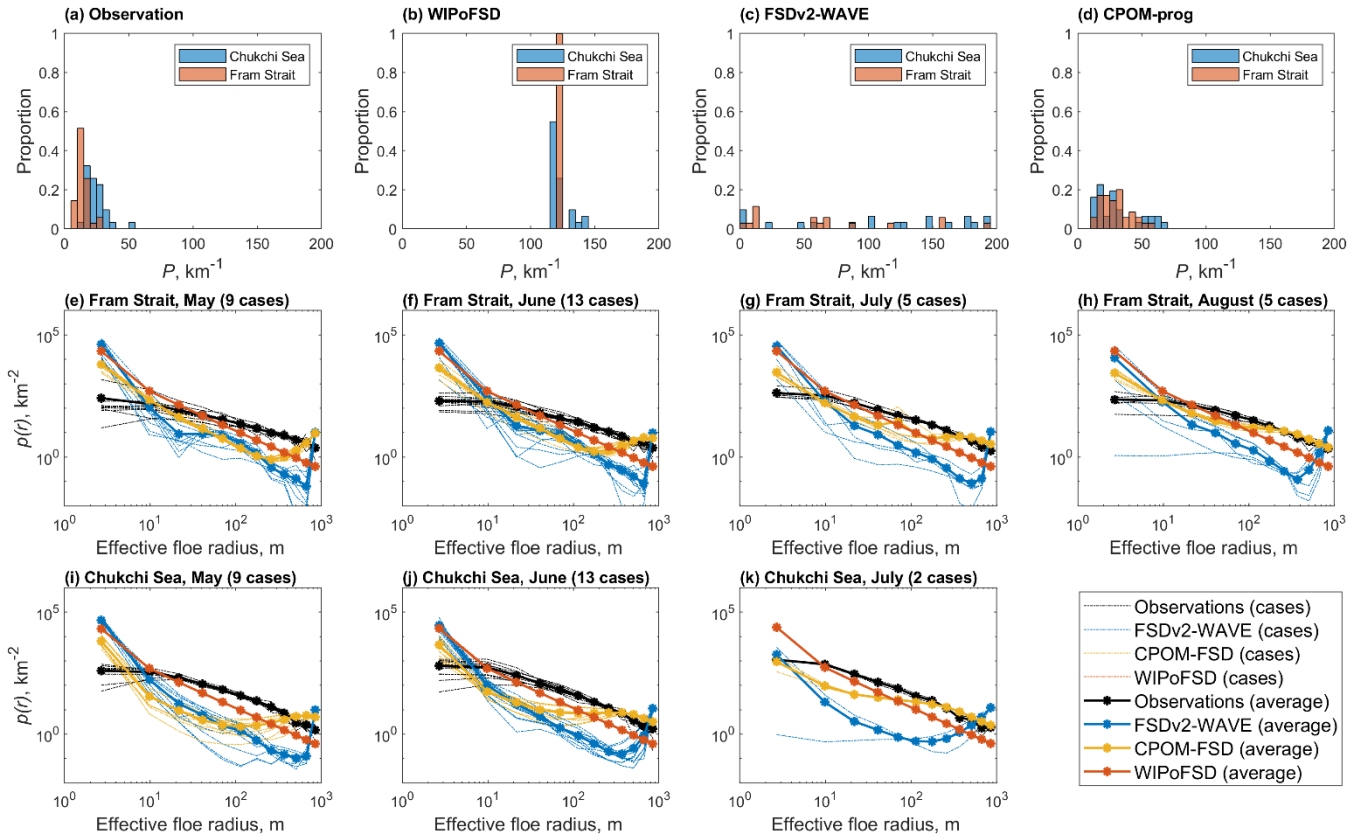

**Figure S2.** Frequency histograms of floe  $P$  from (a) observation, (b) WIPoFSD, (c) FSDv2-WAVE and (d) CPOM-FSD. In (a)–(d), blue colour indicates the frequency distribution of  $P$  for the Chukchi Sea and red colour for the Fram Strait.  $p(r)$  are shown for (e) May, (f) June, (g) July and (h) August in Fram Strait, as well as for (i) May, (j) June and (k) July in the Chukchi Sea. In (e)–(k), the observations are shown in black line and three models in different colours (FSDv2-WAVE—blue, CPOM-FSD—yellow, WIPoFSD—red). In (e)–(k), dash lines correspond to the frequency distribution of  $p(r)$  of individual cases in each month and solid lines are the mean of them. This figure is similar to Fig. 2 in the main text, but study area selected for models is a  $5 \times 5$  grid-cells area containing the observational study regions.

**Table S1.** Difference in  $p(r)$  ( $\text{km}^{-1}$ ) of small floes integrated in floe size category 1 and 2 ( $r < 14.29$  m) between models and observations in the Chukchi Sea region and the Fram Strait region.

|               | FSDV2-WAVE      |                 | CPOM-FSD |       | WIPOFSD |        |
|---------------|-----------------|-----------------|----------|-------|---------|--------|
|               | CS <sup>a</sup> | FS <sup>b</sup> | CS       | FS    | CS      | FS     |
| <b>May</b>    | 151.57          | 218.95          | 52.46    | 83.41 | 108.76  | 124.76 |
| <b>June</b>   | 129.65          | 211.29          | 53.25    | 49.21 | 107.38  | 125.99 |
| <b>July</b>   | 57.60           | 108.86          | 38.95    | 20.60 | 106.41  | 129.68 |
| <b>August</b> | /               | 33.94           | /        | 20.42 | /       | 146.07 |
| <b>Mean</b>   | 112.94          | 143.26          | 48.22    | 43.41 | 107.52  | 131.62 |

75 <sup>a</sup> Chukchi Sea.

<sup>b</sup> Fram Strait.

**Table S2.** Summary of high-resolution optical satellite imagery used in this study, including satellite images provided by Measurements of Earth Data for Environmental Analysis (MEDEA) group (Kwok and Untersteiner, 2011; Kwok, 2014), WorldView-1 (WV1, Satellite Imaging Corporation, <https://www.satimagingcorp.com/satellite-sensors/worldview-1/>, last access: 16 February 2023) and WorldView-2 (WV2, Satellite Imaging Corporation, <https://www.satimagingcorp.com/satellite-sensors/worldview-2/>, last access: 16 February 2023).  $\delta$  is the resolution of the satellite images.  $d_{min}$  is the lower bound of floes following the power law. p-value is of KS goodness-of-fit test.

| Image name and date   | Image type | $\delta$ (m) | Location        | Cut image size (pixel) | $d_{min}$ (m) | $\alpha$ | p-value |
|-----------------------|------------|--------------|-----------------|------------------------|---------------|----------|---------|
| chukchi_20060517      | MEDEA      | 1            | 70°N, 170°W     | 10675×11916            | 35            | 2.11     | 0       |
| chukchi_20060603      | MEDEA      | 1            | 70°N, 170°W     | 5024×10832             | 100           | 2.30     | 0.110   |
| chukchi_20060604      | MEDEA      | 1            | 70°N, 170°W     | 13486×17557            | 173           | 2.54     | 0.627   |
| chukchi_20060612      | MEDEA      | 1            | 70°N, 170°W     | 14048×12704            | 36            | 2.23     | 0       |
| chukchi_20070610      | MEDEA      | 1            | 70°N, 170°W     | 11728×7360             | 43            | 2.29     | 0.159   |
| chukchi_20080612      | MEDEA      | 1            | 70°N, 170°W     | 13632×14112            | 161           | 2.57     | 0.097   |
| chukchi_20090601      | MEDEA      | 1            | 70°N, 170°W     | 7136×4832              | 100           | 2.34     | 0.470   |
| chukchi_20090608_cut1 | MEDEA      | 1            | 70°N, 170°W     | 9152×7328              | 118           | 2.64     | 0.490   |
| chukchi_20090608_cut2 | MEDEA      | 1            | 70°N, 170°W     | 6000×6408              | 35            | 2.76     | 0       |
| chukchi_20100527      | MEDEA      | 1            | 70°N, 170°W     | 5236×5736              | 116           | 2.59     | 0.120   |
| chukchi_20100530_cut1 | MEDEA      | 1            | 70°N, 170°W     | 7632×8544              | 35            | 2.14     | 0.002   |
| chukchi_20100530_cut2 | MEDEA      | 1            | 70°N, 170°W     | 7080×10944             | 165           | 2.68     | 0.014   |
| chukchi_20110529      | MEDEA      | 1            | 70°N, 170°W     | 12192×8256             | 64            | 2.31     | 0.001   |
| chukchi_20120601      | MEDEA      | 1            | 70°N, 170°W     | 8557×9799              | 238           | 2.72     | 0.210   |
| chukchi_20130509      | MEDEA      | 1            | 70°N, 170°W     | 16416×13104            | 136           | 2.44     | 0.014   |
| chukchi_20130531      | MEDEA      | 1            | 70°N, 170°W     | 12736×5168             | 50            | 2.36     | 0.141   |
| chukchi_20130601_WV2  | WV2        | 0.54         | 71.5°N, 169.5°W | 20556×10439            | 33            | 2.39     | 0.906   |
| chukchi_20130610_cut1 | MEDEA      | 1            | 70°N, 170°W     | 8352×12960             | 311           | 3.45     | 0.722   |
| chukchi_20130610_cut2 | MEDEA      | 1            | 70°N, 170°W     | 4248×10176             | 193           | 3.07     | 0.929   |

|                       |       |      |                 |             |     |      |       |
|-----------------------|-------|------|-----------------|-------------|-----|------|-------|
| chukchi_20130617      | MEDEA | 1    | 70°N, 170°W     | 12480×10512 | 193 | 2.88 | 0.200 |
| chukchi_20130707_WV2  | WV2   | 0.47 | 72.6°N, 168.7°W | 13992×11160 | 18  | 2.23 | 0.001 |
| chukchi_20140502      | MEDEA | 1    | 70°N, 170°W     | 13504×12672 | 105 | 2.48 | 0.133 |
| chukchi_20140513      | MEDEA | 1    | 70°N, 170°W     | 16656×12096 | 147 | 2.57 | 0     |
| chukchi_20140527_cut1 | MEDEA | 1    | 70°N, 170°W     | 15616×4640  | 101 | 2.53 | 0.460 |
| chukchi_20140527_cut2 | MEDEA | 1    | 70°N, 170°W     | 16000×2464  | 36  | 2.20 | 0.185 |
| chukchi_20140610_cut1 | MEDEA | 1    | 70°N, 170°W     | 13008×6144  | 257 | 3.04 | 0.600 |
| chukchi_20140610_cut2 | MEDEA | 1    | 70°N, 170°W     | 12912×5520  | 114 | 2.52 | 0.110 |
| chukchi_20140623      | MEDEA | 1    | 70°N, 170°W     | 6928×6480   | 185 | 2.54 | 0.430 |
| chukchi_20140624_WV2  | WV2   | 0.58 | 72.6°N, 168.7°W | 13248×11616 | 20  | 2.36 | 0.273 |
| chukchi_20140707_cut1 | MEDEA | 1    | 70°N, 170°W     | 12976×3552  | 111 | 2.42 | 0.310 |
| chukchi_20140707_cut2 | MEDEA | 1    | 70°N, 170°W     | 12928×2368  | 55  | 2.50 | 0.904 |
| chukchi_20140707_cut3 | MEDEA | 1    | 70°N, 170°W     | 12848×2176  | 48  | 2.29 | 0.758 |
| fram_20000607         | MEDEA | 1    | 84.9°N, 0.1°E   | 14472×12552 | 42  | 2.03 | 0.653 |
| fram_20010606         | MEDEA | 1    | 84.9°N, 0.1°E   | 12768×8256  | 104 | 2    | 0.131 |
| fram_20010611         | MEDEA | 1    | 84.9°N, 0.1°E   | 16008×8616  | 402 | 2.49 | 0.460 |
| fram_20010615         | MEDEA | 1    | 84.9°N, 0.1°E   | 16416×7440  | 38  | 1.98 | 0.226 |
| fram_20010624         | MEDEA | 1    | 84.9°N, 0.1°E   | 8212×12946  | 160 | 2.31 | 0.420 |
| fram_20010630_cut1    | MEDEA | 1    | 84.9°N, 0.1°E   | 7640×8924   | 64  | 2.29 | 0.119 |
| fram_20010630_cut2    | MEDEA | 1    | 84.9°N, 0.1°E   | 6448×7440   | 168 | 2.77 | 0.378 |
| fram_20020608_cut1    | MEDEA | 1    | 84.9°N, 0.1°E   | 9728×7392   | 148 | 2.25 | 0.190 |
| fram_20020608_cut2    | MEDEA | 1    | 84.9°N, 0.1°E   | 12672×6176  | 36  | 2.12 | 0.113 |
| fram_20060613         | MEDEA | 1    | 84.9°N, 0.1°E   | 13200×12672 | 756 | 2.91 | 0.260 |
| fram_20060719         | MEDEA | 1    | 84.9°N, 0.1°E   | 12928×9952  | 387 | 2.97 | 0.990 |
| fram_20060803         | MEDEA | 1    | 84.9°N, 0.1°E   | 15712×8960  | 227 | 2.38 | 0.290 |

|                    |       |      |               |             |     |      |       |
|--------------------|-------|------|---------------|-------------|-----|------|-------|
| fram_20060810      | MEDEA | 1    | 84.9°N, 0.1°E | 10848×9344  | 175 | 2.45 | 0.350 |
| fram_20060825      | MEDEA | 1    | 84.9°N, 0.1°E | 7536×5856   | 199 | 2.38 | 0.270 |
| fram_20070511      | MEDEA | 1    | 84.9°N, 0.1°E | 14560×10816 | 36  | 1.72 | 0.065 |
| fram_20090501      | MEDEA | 1    | 84.9°N, 0.1°E | 12544×12128 | 150 | 2.42 | 0.752 |
| fram_20090602      | MEDEA | 1    | 84.9°N, 0.1°E | 11486×11486 | 192 | 2.53 | 0.682 |
| fram_20090703      | MEDEA | 1    | 84.9°N, 0.1°E | 13248×10192 | 39  | 2.34 | 0.000 |
| fram_20090804      | MEDEA | 1    | 84.9°N, 0.1°E | 12888×9024  | 143 | 2.52 | 0.402 |
| fram_20100629_cut1 | MEDEA | 1    | 84.9°N, 0.1°E | 10032×8448  | 34  | 2.15 | 0.634 |
| fram_20100629_cut2 | MEDEA | 1    | 84.9°N, 0.1°E | 10608×5040  | 30  | 2.05 | 0.148 |
| fram_20100820      | MEDEA | 1    | 84.9°N, 0.1°E | 9528×10944  | 252 | 2.78 | 0.877 |
| fram_20120519      | MEDEA | 1    | 84.9°N, 0.1°E | 10912×6656  | 147 | 1.93 | 0.120 |
| fram_20120625      | MEDEA | 1    | 84.9°N, 0.1°E | 12885×12721 | 35  | 2.19 | 0.000 |
| fram_20120728      | MEDEA | 1    | 84.9°N, 0.1°E | 14712×11088 | 212 | 2.45 | 0.215 |
| fram_20130510      | MEDEA | 1    | 84.9°N, 0.1°E | 9216×5920   | 458 | 2.66 | 0.140 |
| fram_20130520      | MEDEA | 1    | 84.9°N, 0.1°E | 14144×9152  | 388 | 2.42 | 0.570 |
| fram_20130524_WV1  | WV1   | 0.52 | 76°N, 14°W    | 14016×11280 | 18  | 2.19 | 0.372 |
| fram_20130528      | MEDEA | 1    | 84.9°N, 0.1°E | 11872×5792  | 317 | 2.23 | 0.120 |
| fram_20130605      | MEDEA | 1    | 84.9°N, 0.1°E | 10976×9696  | 364 | 2.58 | 0.760 |
| fram_20130605_WV2  | WV2   | 0.59 | 84.9°N, 0.1°E | 16776×14256 | 18  | 1.98 | 0.263 |
| fram_20130618      | MEDEA | 1    | 84.9°N, 0.1°E | 10608×10584 | 240 | 2.68 | 0.520 |
| fram_20130720      | MEDEA | 1    | 84.9°N, 0.1°E | 13120×12480 | 36  | 2.14 | 0.000 |
| fram_20140505      | MEDEA | 1    | 84.9°N, 0.1°E | 10656×16512 | 197 | 2.32 | 0.333 |
| fram_20140516      | MEDEA | 1    | 84.9°N, 0.1°E | 12720×18000 | 92  | 1.96 | 0.380 |
| fram_20140707      | MEDEA | 1    | 84.9°N, 0.1°E | 12388×13343 | 294 | 2.38 | 0.830 |

**Table S3.** Mean and standard deviation of the modelling  $P$  (km km<sup>-2</sup>) of in the study regions of the Chukchi Sea (CS) and the Fram Strait (FS) shown in Fig. 1a in the main text and in a 5×5 grid cells containing the locations of observations.

|                         | FSDV2-WAVE      |                 | CPOM-FSD    |             | WIPOFSD     |              |
|-------------------------|-----------------|-----------------|-------------|-------------|-------------|--------------|
|                         | CS <sup>a</sup> | FS <sup>b</sup> | CS          | FS          | CS          | FS           |
| <b>Original regions</b> | 136.95±70.58    | 178.36±89.28    | 59.55±19.13 | 61.19±28.95 | 120.93±1.66 | 138.99±12.98 |
| <b>5x5 grid cells</b>   | 168.09±98.66    | 195.02±131.37   | 30.31±17.18 | 29.57±10.86 | 123.25±7.06 | 122.40±0.00  |

85    **References**

Bateson, A. W., Feltham, D. L., Schröder, D., Hosekova, L., Ridley, J. K., and Aksenov, Y.: Impact of sea ice floe size distribution on seasonal fragmentation and melt of Arctic sea ice, *Cryosph.*, 14, 403–428, <https://doi.org/10.5194/tc-14-403-2020>, 2020.

Bateson, A. W., Feltham, D. L., Schröder, D., Wang, Y., Hwang, B., Ridley, J. K., and Aksenov, Y.: Sea ice floe size: its impact on pan-Arctic and local ice mass and required model complexity, *Cryosph.*, 16, 2565–2593, <https://doi.org/10.5194/tc-16-2565-2022>, 2022.

Kwok, R. and Untersteiner, N.: New High-Resolution Images of Summer Arctic Sea Ice, *Eos, Trans. Am. Geophys. Union*, 92, 53–54, <https://doi.org/10.1029/2011EO070002>, 2011.

Kwok, R.: Declassified high-resolution visible imagery for Arctic sea ice investigations: An overview, *Remote Sens. Environ.*, 142, 44–56, <https://doi.org/10.1016/j.rse.2013.11.015>, 2014.

Perovich, D. K.: Aerial observations of the evolution of ice surface conditions during summer, *J. Geophys. Res.*, 107, 8048, <https://doi.org/10.1029/2000JC000449>, 2002.

Perovich, D. K. and Jones, K. F.: The seasonal evolution of sea ice floe size distribution, *J. Geophys. Res. Ocean.*, 119, 8767–8777, <https://doi.org/10.1002/2014JC010136>, 2014.

Roach, L. A., Horvat, C., Dean, S. M., and Bitz, C. M.: An Emergent Sea Ice Floe Size Distribution in a Global Coupled Ocean-Sea Ice Model, *J. Geophys. Res. Ocean.*, 123, 4322–4337, <https://doi.org/10.1029/2017JC013692>, 2018a.

Satellite Imaging Corporation, WorldView-1 Satellite Sensor: WorldView-1 Satellite Image, <https://www.satimagingcorp.com/satellite-sensors/worldview-1/>, last access: 16 February 2023.

Satellite Imaging Corporation, WorldView-2 Satellite Sensor: WorldView-2 Satellite Image, <https://www.satimagingcorp.com/satellite-sensors/worldview-2/>, last access: 16 February 2023.



Horvat, C. and Tziperman, E.: A prognostic model of the sea-ice floe size and thickness distribution, 9, 2119–2134, <https://doi.org/10.5194/tc-9-2119-2015>, 2015.
